# Supplementary material
Source: publisher figshare collection journal article supplement (https://karger.figshare.com/ndownloader/files/12820157)
Supplement: Supplementary file 1 [file 12820157]

**Supplementary material**

| Supplementary Table 1. Patient immunological assays in allergy and controls | | | | |
| --- | --- | --- | --- | --- |
| Characteristic | AD | AR | CU | Controls |
| Eosinophils |  |  |  |  |
| Subjects submitted | 45 | 24 | 21 | 17 |
| Value(109/L) | 0.257±0.257 | 0.348±0.297*****,**†** | 0.153±0.150 | 0.128±0.080 |
| Total IgE |  |  |  |  |
| Subjects submitted | 81 | 40 | 41 | 17 |
| Value(KU/L) | 317.73±443.22** | 408.77±519.30******* | 228.91±337.03* | 42.17±25.97 |
| HDM-specific IgE positive |  |  |  |  |
| Subjects submitted | 84 | 43 | 41 | NS |
| Value(%) | 39(46.4) | 28(65.1)**†††** | 11(26.8) |  |
| Food-specific IgG4 positive |  |  |  |  |
| Subjects submitted | 58 | 12 | 46 | NS |
| Value(%) | 29(50) | 7(58.3) | 22(47.8) |  |

IBS, irritable bowel syndrome; AD, allergic disease; AR, allergic rhinitis; CU, chronic urticaria; HDM, house dust mite.

**P*<0.05 compared with controls; ***P*<0.01 compared with controls; **†***P*<0.05 compared with CU; **†††***P*<0.001 compared with CU.
